# Supplementary material for: DNA-based detection of mercury(ii) ions through characteristic current signals in nanopores with high sensitivity and selectivity
Source: Royal Society of Chemistry journal article supplement (doi:10.1039/c4nr02062f), 2014-01-01
Supplement: c4nr02062f1.pdf [file c4nr02062f1.pdf]

Supplementary Materials for

## DNA-based Detection of Mercury(II) Ions through Characteristic Current Signals in Nanopore with High Sensitivity and Selectivity

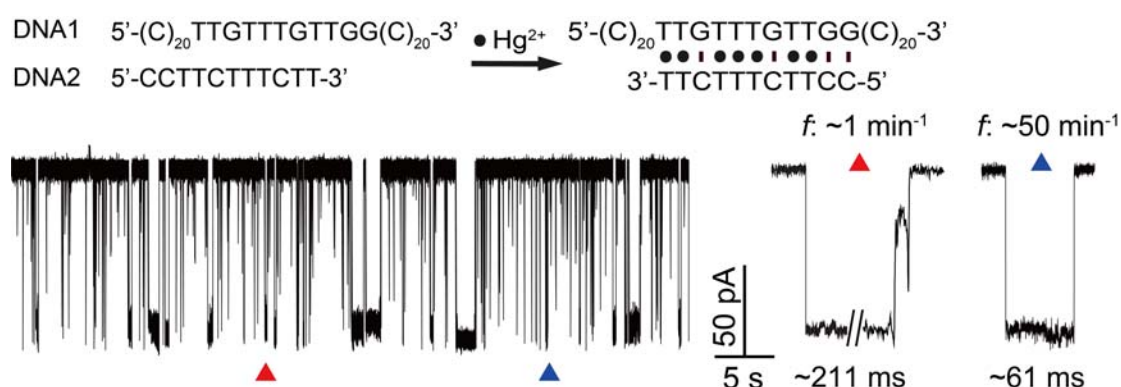

**Fig. S1.** A representative current trace of the translocation of probe DNA1/DNA2 (1  $\mu\text{M}$  final concentration for each DNA fragment) through  $\alpha\text{HL}$  in the presence of 100  $\mu\text{M}$   $\text{Hg}^{2+}$ . Events were dominated by single-level prolonged blocks (blue triangle, frequency:  $\sim 50 \text{ min}^{-1}$ ), and three-level signals only occasionally occurred (red triangle, frequency:  $\sim 1 \text{ min}^{-1}$ ). All traces were recorded at +120 mV in the buffer of 1 M KCl and 10 mM Tris, pH 8.0. DNA probe and  $\text{Hg}^{2+}$  were preincubated at  $15 \pm 2^\circ\text{C}$  overnight before measurement. (number of individual experiments  $n = 3$ )

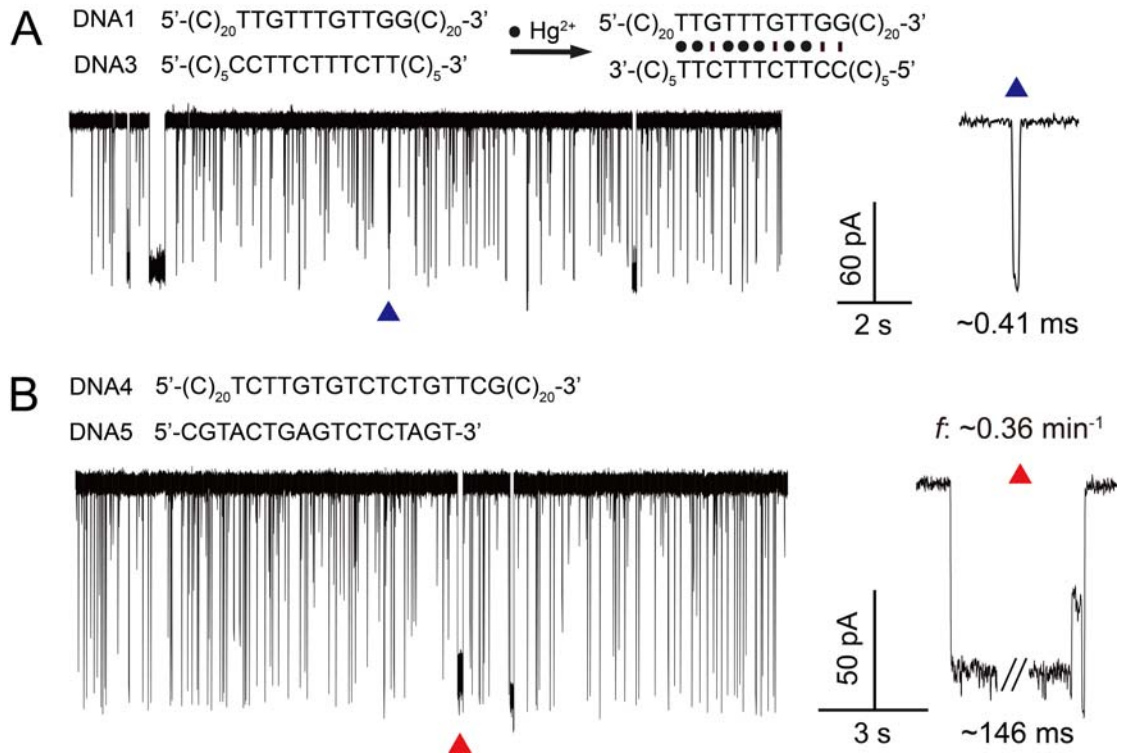

**Fig. S2.** (A) A representative current trace of the translocation of probe DNA1/DNA3 (1  $\mu\text{M}$  final concentration for each DNA fragment) through  $\alpha\text{HL}$  in the presence of  $\text{Hg}^{2+}$  (3  $\mu\text{M}$  final concentration). DNA3 had an additional 5-cytosine tail at the 3' and 5' end as compared with DNA2. No three-level signals were observed when using this modification. Expanded view of a typical ssDNA translocation event was given on the right panel. (B) A representative current trace of the translocation of probe DNA4/DNA5 (1  $\mu\text{M}$  final concentration for each DNA fragment) through  $\alpha\text{HL}$  in the absence of  $\text{Hg}^{2+}$ . DNA4/DNA5 contained seventeen base pairings including six T-T mismatches. Signature events (red triangle) were observed in control group, at a frequency of  $\sim 0.36 \text{ min}^{-1}$ . All traces were recorded at +120 mV in the buffer of 1 M KCl and 10 mM Tris, pH 8.0. DNA1/DNA3 and DNA4/DNA5 were preincubated with or without  $\text{Hg}^{2+}$  at  $15 \pm 2^\circ\text{C}$  overnight before measurement. (number of individual experiments  $n = 3$ )

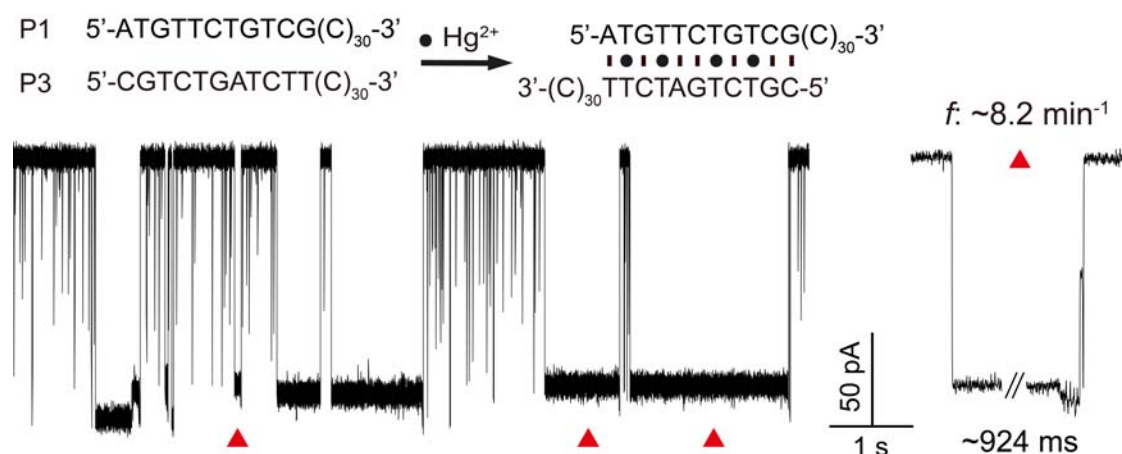

**Fig. S3.** (A) A representative current trace of the translocation of probe P1/P3 (1  $\mu\text{M}$  final concentration for each DNA fragment) through  $\alpha\text{HL}$  in the presence of  $\text{Hg}^{2+}$  (3  $\mu\text{M}$  final concentration). P1/P3 contained seven Watson-Crick base pairs and four T-T mismatches; upon  $\text{Hg}^{2+}$  exposure, about 8.2 three-level signals were observed per minute (red triangle, expanded view on the right panel), which was comparable to the value obtained in P1/P2 which had a frequency of *ca.* 8.9  $\text{min}^{-1}$ . Yet, a large number of ssDNA translocation events also appeared when using this probe, indicating that only part of the P1/P3 probe formed complexes with  $\text{Hg}^{2+}$ . Traces were recorded at +140 mV in the buffer of 1 M KCl and 10 mM Tris, pH 8.0. P1/P3 was preincubated with  $\text{Hg}^{2+}$  at  $15 \pm 2$   $^{\circ}\text{C}$  overnight before measurement. (number of individual experiments  $n = 3$ )

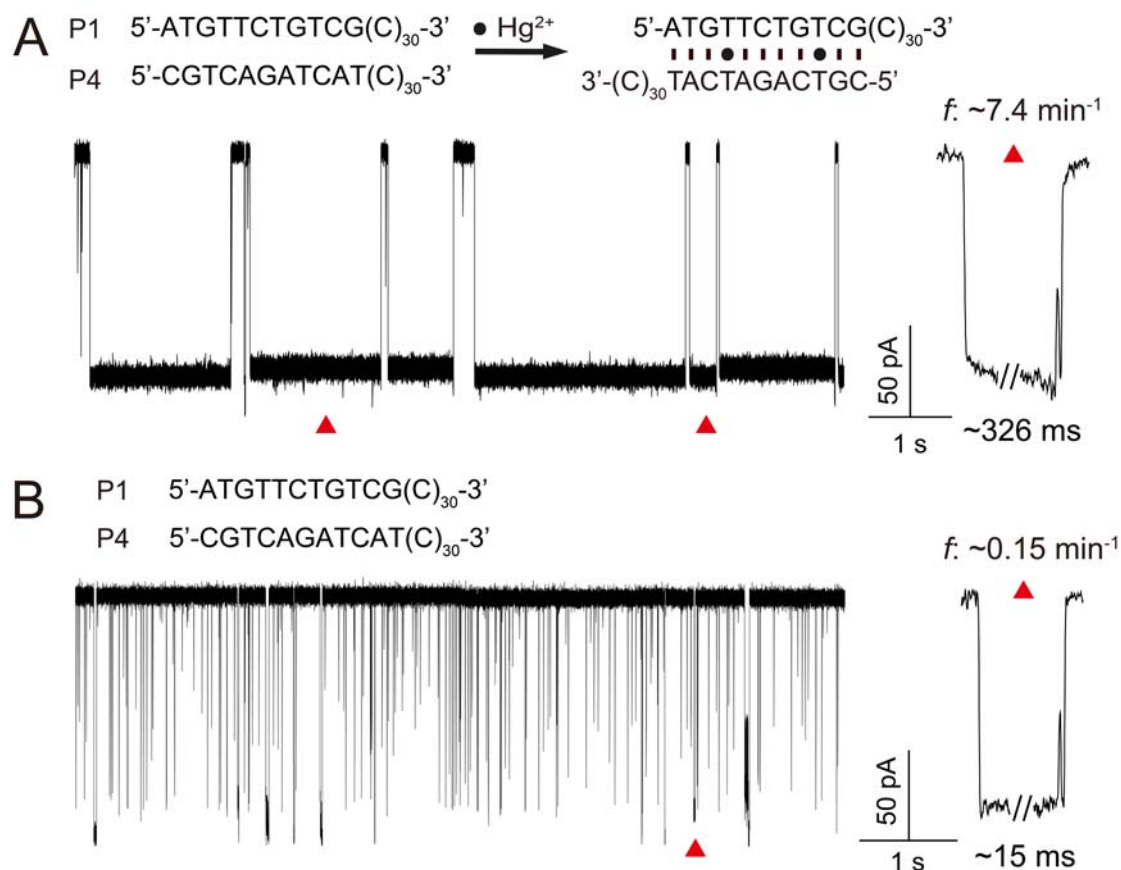

**Fig. S4.** Representative current traces of the translocation of probe P1/P4 (1  $\mu\text{M}$  final concentration for each DNA fragment) through  $\alpha\text{HL}$  in the presence (A) or absence (B) of 3  $\mu\text{M}$   $\text{Hg}^{2+}$ . P1/P4 contained nine Watson-Crick base pairs and two T-T mismatches. Though incubation of P1/P4 with  $\text{Hg}^{2+}$  would result in a signature occurrence rate of  $\sim 7.4 \text{ min}^{-1}$  (A), occasional background interference was also observed, at a frequency of *ca.*  $0.15 \text{ min}^{-1}$  (B), limiting the application of this probe for highly sensitive detection of  $\text{Hg}^{2+}$ . Expanded view of typical signature events (red triangle) were given on the right panel. All traces were recorded at +140 mV in the buffer of 1 M KCl and 10 mM Tris, pH 8.0. P1/P4 was preincubated with or without  $\text{Hg}^{2+}$  at  $15 \pm 2^\circ\text{C}$  overnight before measurement. (number of individual experiments  $n = 3$ )

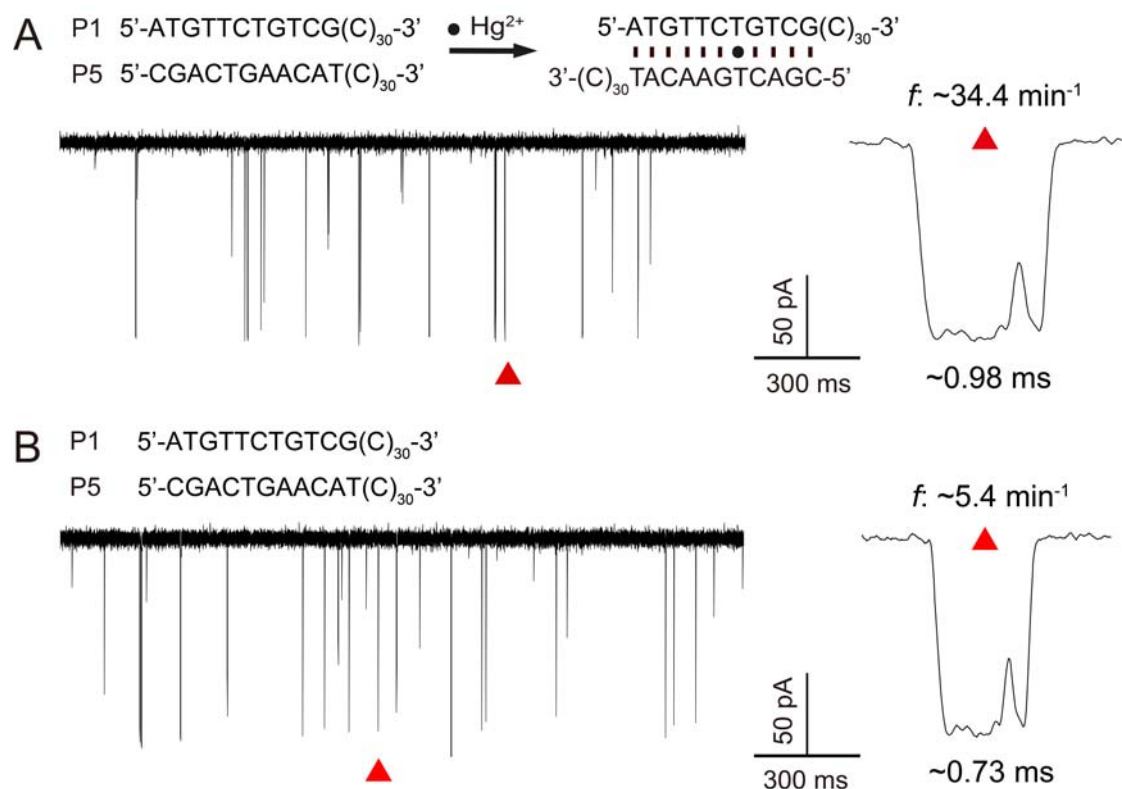

**Fig. S5.** Representative current traces of the translocation of probe P1/P5 (1  $\mu\text{M}$  final concentration for each DNA fragment) through  $\alpha\text{HL}$  in the presence (A) or absence (B) of 3  $\mu\text{M}$   $\text{Hg}^{2+}$ . P1/P5 contained ten Watson-Crick base pairs and one T-T mismatch. Detection of  $\text{Hg}^{2+}$  was significantly perturbed by the frequent background signals ( $\sim 5.4 \text{ min}^{-1}$ ) that could hardly be separated with those obtained in the presence of  $\text{Hg}^{2+}$ . Expanded view of typical signature events (red triangle) were given on the right panel. All traces were recorded at +140 mV in the buffer of 1 M KCl and 10 mM Tris, pH 8.0. P1/P5 was preincubated with or without  $\text{Hg}^{2+}$  at  $15 \pm 2^\circ\text{C}$  overnight before measurement. (number of individual experiments  $n = 3$ )

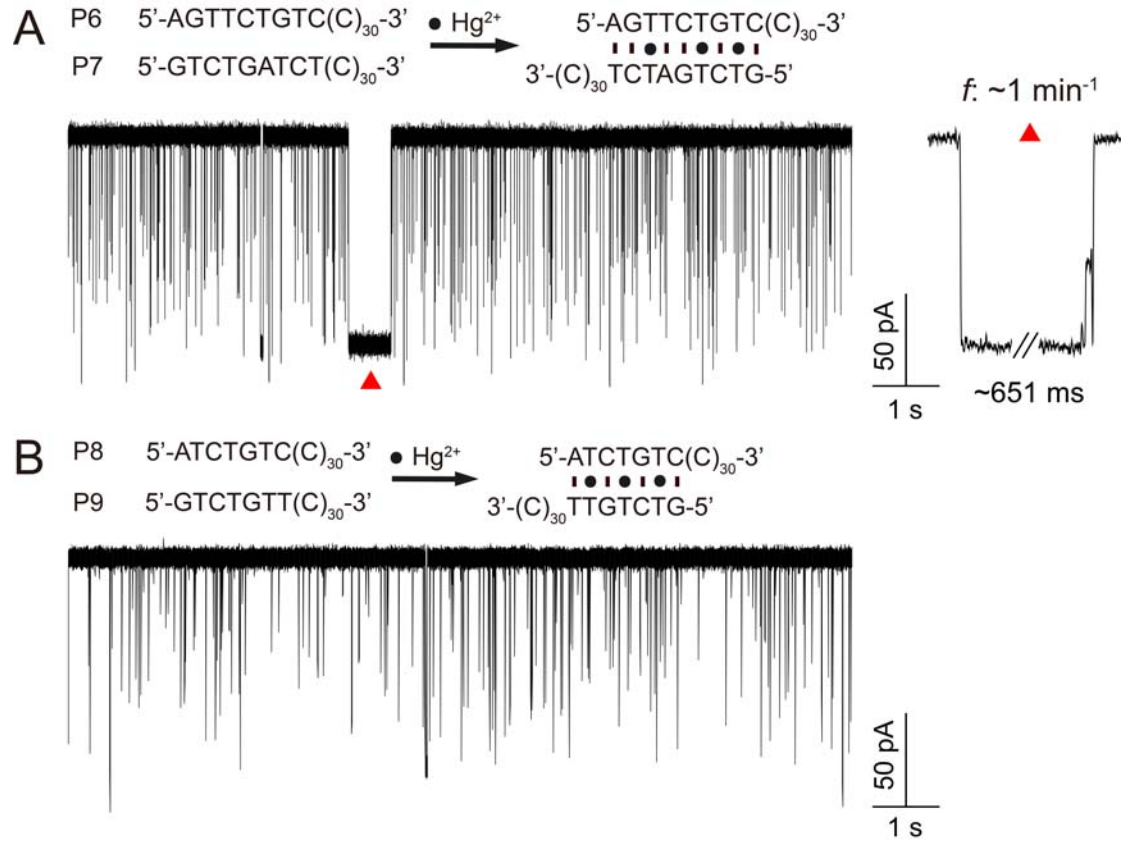

**Fig. S6.** Representative current traces of the translocation of probe P6/P7 (A) and P8/P9 (B) through  $\alpha$ HL in the presence of 3  $\mu$ M Hg<sup>2+</sup>, respectively (final concentration of probe: 1  $\mu$ M for each DNA fragment). P6/P7 contained six Watson-Crick base pairs and three T-T mismatches, while P8/P9 had four Watson-Crick base pairs and three T-T mismatches. Upon Hg<sup>2+</sup> exposure, the desired three-level events significantly decreased ( $\sim 1 \text{ min}^{-1}$ , P6/P7) or even completely disappeared (P8/P9). All traces were recorded at +140 mV in the buffer of 1 M KCl and 10 mM Tris, pH 8.0. P6/P7 and P8/P9 were preincubated with Hg<sup>2+</sup> at  $15 \pm 2 \text{ }^{\circ}\text{C}$  overnight before measurement. (number of individual experiments  $n = 3$ )

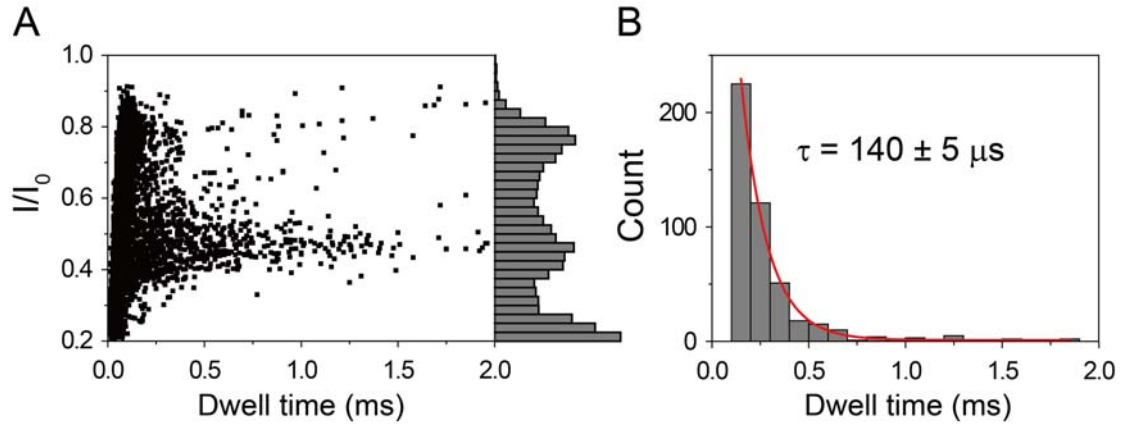

**Fig. S7.** (A) Scatter plot of the events caused by probe P1/P2 (1  $\mu\text{M}$  final concentration for each DNA fragment) in the absence of  $\text{Hg}^{2+}$ . According to  $I/I_0$  histogram, the translocation of single-stranded probe fragments gave an average current blockage of  $\sim 77\%$ . (B) Dwell time histogram of P1/P2 translocation events ( $I/I_0 > 0.7$ ). Data are fitted by a monoexponential function (solid line), giving a lifetime ( $\tau$ ) of  $140 \pm 5 \mu\text{s}$ . All traces were recorded at +140 mV in the buffer of 1 M KCl and 10 mM Tris, pH 8.0. P1/P2 was incubated without  $\text{Hg}^{2+}$  at  $15 \pm 2^\circ\text{C}$  overnight before measurement. (number of individual experiments  $n = 6$ )

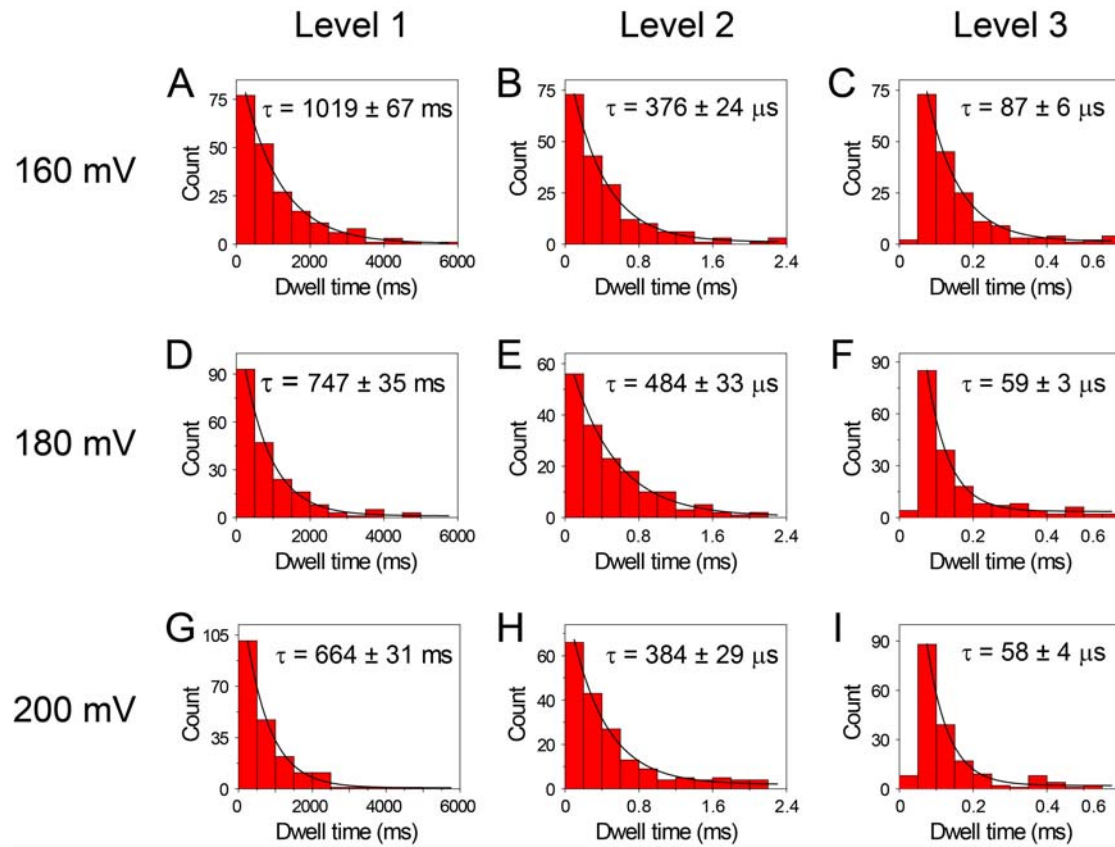

**Fig. S8.** Voltage-dependence of the durations of the three levels in  $\text{Hg}^{2+}$ -related signature events. All histograms were constructed based on at least 200 signature events. Data were fitted by a monoexponential decay function. Data were acquired at +160 mV, +180 mV, and +200 mV respectively in the buffer of 1 M KCl and 10 mM Tris, pH 8.0. Probe P1/P2 (1  $\mu\text{M}$ ) and  $\text{Hg}^{2+}$  (3  $\mu\text{M}$ ) were preincubated at  $15 \pm 2^\circ\text{C}$  overnight before measurement. (number of individual experiments  $n = 3$ ).

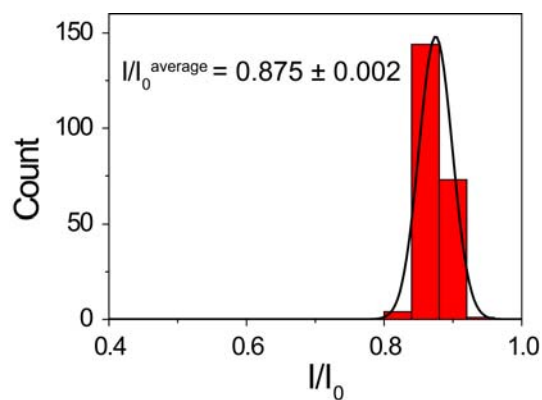

**Fig. S9.**  $I/I_0$  histogram of the long-lived single-level blockades caused by P1/P2 (1  $\mu\text{M}$  final concentration for each fragment) in the presence of 3  $\mu\text{M}$   $\text{Hg}^{2+}$ . The Gaussian fitting results indicated that the blockades had an average current blockage of  $0.875 \pm 0.002$ , which highly resembles the value of Level 1. The data were acquired at +140 mV in the buffer of 1 M KCl and 10 mM Tris, pH 8.0. P1/P2 was incubated with  $\text{Hg}^{2+}$  at  $15 \pm 2$  °C overnight before measurement. (number of individual experiments  $n = 6$ )

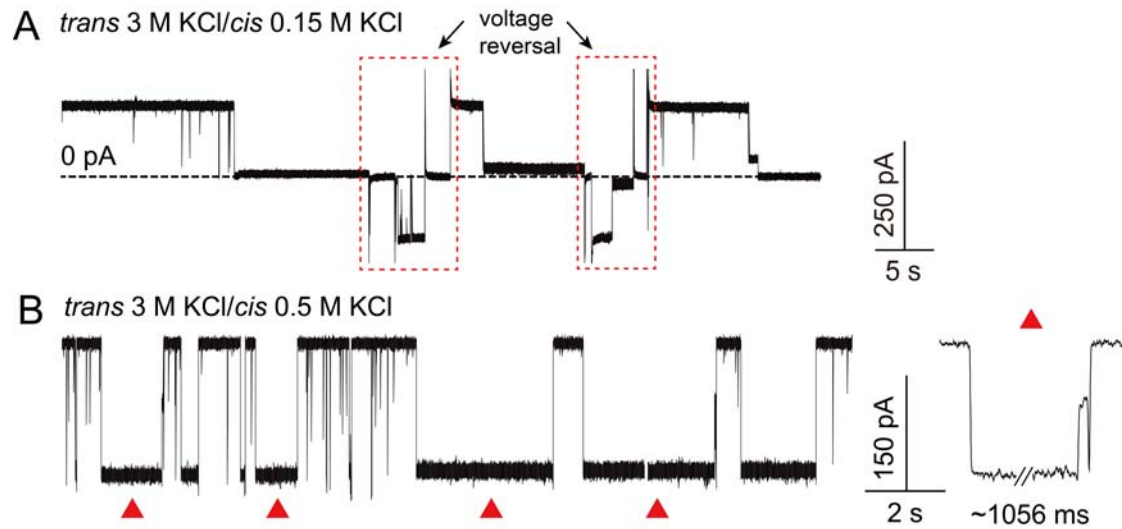

**Fig. S10.** (A) A representative current trace of the translocation of probe P1/P2 (1 nM final concentration for each DNA fragment) through  $\alpha$ HL in 3 M *trans*/0.15 M *cis* KCl in the presence of 10 nM  $\text{Hg}^{2+}$ . Permanent blocking frequently occurred under this condition, which needed brief voltage reversal (dashed rectangle) to continue recording. (B) A representative current trace of the translocation of probe P1/P2 (10 nM final concentration for each fragment) through  $\alpha$ HL in 3 M *trans*/0.5 M *cis* KCl in the presence of 100 nM  $\text{Hg}^{2+}$ . As was shown, pore cloggings were significantly reduced with lowered salt gradient; at the same time, characteristic current patterns (red triangle, expanded view on the right panel) were unaffected under such an asymmetrical condition. All traces were recorded at +140 mV. Probe P1/P2 was preincubated with  $\text{Hg}^{2+}$  at  $15 \pm 2^\circ\text{C}$  overnight before measurement. (number of individual experiments  $n = 3$ )

**Table S1.** Voltage-dependence of the frequency of  $\text{Hg}^{2+}$ -related signature events. Data were acquired at +140 mV, +160 mV, +180 mV, and +200 mV respectively in the buffer of 1 M KCl and 10 mM Tris, pH 8.0. Probe P1/P2 (1  $\mu\text{M}$ ) and  $\text{Hg}^{2+}$  (3  $\mu\text{M}$ ) were preincubated at  $15 \pm 2$  °C overnight before measurement. (number of individual experiments  $n = 6$  for 140 mV or 3 for other potentials).

| Voltage (mV) | $f_{\text{Hg}}$ ( $\text{min}^{-1}$ ) |
|--------------|---------------------------------------|
| 140          | $8.9 \pm 0.6$                         |
| 160          | $14.8 \pm 0.9$                        |
| 180          | $26.6 \pm 1.8$                        |
| 200          | $30.2 \pm 1.3$                        |

**Table S2.** Frequency of the  $\text{Hg}^{2+}$ -related three-level signals ( $f_{\text{Hg}}$ ) at different  $\text{Hg}^{2+}$  concentrations. Experiments were conducted in asymmetrical KCl solutions, 3 M *trans*/0.5 M *cis*, buffered with 10 mM Tris, pH 8.0 with the transmembrane potential held at +140 mV. DNA probe P1/P2 (10 nM final concentration for each DNA fragment) was preincubated with 0, 0.5, 1.0, 5, 10, 50, 100, and 250 nM of  $\text{Hg}^{2+}$  respectively at  $15 \pm 2$  °C overnight. (number of individual experiments n = 3)

| Concentration of $\text{Hg}^{2+}$ (nM) | $f_{\text{Hg}}$ ( $\text{min}^{-1}$ ) |
|----------------------------------------|---------------------------------------|
| 0                                      | $0 \pm 0$                             |
| 0.5                                    | $0.13 \pm 0.06$                       |
| 1                                      | $0.50 \pm 0.10$                       |
| 5                                      | $2.05 \pm 0.21$                       |
| 10                                     | $4.12 \pm 0.35$                       |
| 50                                     | $5.51 \pm 0.56$                       |
| 100                                    | $6.63 \pm 0.51$                       |
| 250                                    | $6.44 \pm 0.65$                       |
